# Supplementary material for: Diminished Prolinemia in Chronic Chagasic Patients: A New Clue for Disease Pathology?
Source: PubMed Central journal article supplement (PMC6749509; doi:10.3390/molecules24173167), 2019-08-30
Supplement: molecules-24-03167-s001.pdf [file molecules-24-03167-s001.pdf]

Table S1: Individual prolinemia data

| UNIN  | IND   | CCC   |       |
|-------|-------|-------|-------|
|       |       | M/M   | SEV   |
| 0.487 | 0.424 | 0.484 | 0.482 |
| 0.460 | 0.581 | 0.422 | 0.499 |
| 0.446 | 0.537 | 0.483 | 0.478 |
| 0.378 | 0.359 | 0.424 | 0.412 |
| 0.601 | 0.452 | 0.319 | 0.462 |
| 0.402 | 0.411 | 0.440 | 0.531 |
| 0.419 | 0.316 | 0.548 | 0.387 |
| 0.435 | 0.350 | 0.510 | 0.382 |
| 0.385 | 0.410 | 0.450 | 0.264 |
| 0.425 | 0.327 | 0.339 | 0.433 |
| 0.466 | 0.314 | 0.349 | 0.463 |
| 0.396 | 0.382 | 0.278 | 0.389 |
| 0.339 | 0.424 | 0.533 | 0.364 |
| 0.493 | 0.438 | 0.579 | 0.331 |
| 0.559 | 0.500 | 0.442 | 0.466 |
| 0.487 | 0.331 | 0.433 | 0.406 |
| 0.517 | 0.560 | 0.310 | 0.475 |
| 0.378 | 0.437 | 0.296 | 0.534 |
| 0.421 | 0.406 | 0.399 | 0.495 |
| 0.312 | 0.293 | 0.399 | 0.373 |
| 0.332 | 0.439 | 0.269 | 0.382 |
| 0.596 | 0.356 | 0.405 | 0.206 |
| 0.473 | 0.514 | 0.399 | 0.252 |
| 0.484 | 0.238 | 0.238 | 0.351 |
| 0.487 | 0.473 | 0.417 | 0.527 |
| 0.516 | 0.397 | 0.346 | 0.363 |
| 0.549 | 0.319 |       | 0.334 |
| 0.517 |       |       | 0.219 |
| 0.394 |       |       | 0.277 |
|       |       |       | 0.214 |

Prolinemia data are individually presented as millimol/Liter.

Abbreviations: CCC, chronic chagas cardiomyopathy; IND, indeterminate; M/M, mild and moderate; SEV, severe; UNIN, uninfected

Table S2: Descriptive statistics of prolinemia data

|                      |         |         |         |         |
|----------------------|---------|---------|---------|---------|
| Number of values     | 29      | 27      | 26      | 30      |
| Minimum              | 0.312   | 0.238   | 0.238   | 0.206   |
| 25% Percentile       | 0.395   | 0.331   | 0.334   | 0.3333  |
| Median               | 0.46    | 0.41    | 0.411   | 0.388   |
| 75% Percentile       | 0.5045  | 0.452   | 0.4583  | 0.4758  |
| Maximum              | 0.601   | 0.581   | 0.579   | 0.534   |
| Mean                 | 0.4536  | 0.407   | 0.4043  | 0.3917  |
| Std. Deviation       | 0.07504 | 0.085   | 0.08912 | 0.0976  |
| Std. Error           | 0.01393 | 0.01636 | 0.01748 | 0.01782 |
| Lower 95% CI of mean | 0.425   | 0.3733  | 0.3683  | 0.3553  |
| Upper 95% CI of mean | 0.4821  | 0.4406  | 0.4403  | 0.4281  |
| Sum                  | 13.15   | 10.99   | 10.51   | 11.75   |

Data are presented as millimol/Liter.
